# Supplementary material for: On the assimilation of environmental tracer observations for model-based decision support
Source: Copernicus journal article supplement (doi:10.5194/hess-2019-436), 2019-09-18
Supplement: Supplementary file 1 [file hess-2019-436-supplement.pdf]

## Parameter Summary

| type                                          | transform | count | initial value        | upper bound       | lower bound   | standard deviation |
|-----------------------------------------------|-----------|-------|----------------------|-------------------|---------------|--------------------|
| coastal boundary conductance                  | log       | 14    | 0.576089 to 5        | 5                 | -3            | 1.33333            |
| river-bed conductance                         | log       | 67    | -0.767135 to 5.69897 | 5.69897           | -3            | 1.44983            |
| river-bed conductance                         | mixed     | 271   | -3 to 3.28756        | 5.69897 to 500000 | -3 to 0.001   | 1.44983 to 83333.3 |
| drain conductance                             | log       | 1     | -2.28602             | 2                 | -3            | 0.833333           |
| horizontal hydraulic conductivity             | log       | 235   | -1.43573 to 4        | 2 to 4            | -4 to 0.69897 | 0.333333 to 1.1165 |
| horizontal-vertical anisotropy factor         | log       | 187   | 0.897056 to 3        | 3                 | 0             | 0.5                |
| porosity                                      | log       | 235   | -1                   | -0.823909         | -3            | 0.362682           |
| (irrigation well) abstraction rate multiplier | none      | 1     | 98.9137              | 120               | 80            | 6.66667            |
| recharge multiplier                           | none      | 1     | 99.4197              | 120               | 80            | 6.66667            |
| seasonal river-bed conductance multiplier     | none      | 7     | 100 to 547.22        | 2000              | 100           | 316.667            |
| specific storage                              | log       | 185   | -6.1167 to -5.90237  | -3                | -7            | 0.666667           |
| specific yield                                | log       | 93    | -3.93455 to -0.69897 | -0.69897          | -4            | 0.550172           |
